# Supplementary material
Source: Springer Nature journal article supplement (https://www.springermedizin.de/resource/supplementary/13026_2008_25_MOESM3_ESM.pdf/9644480)

# Patient Counseling

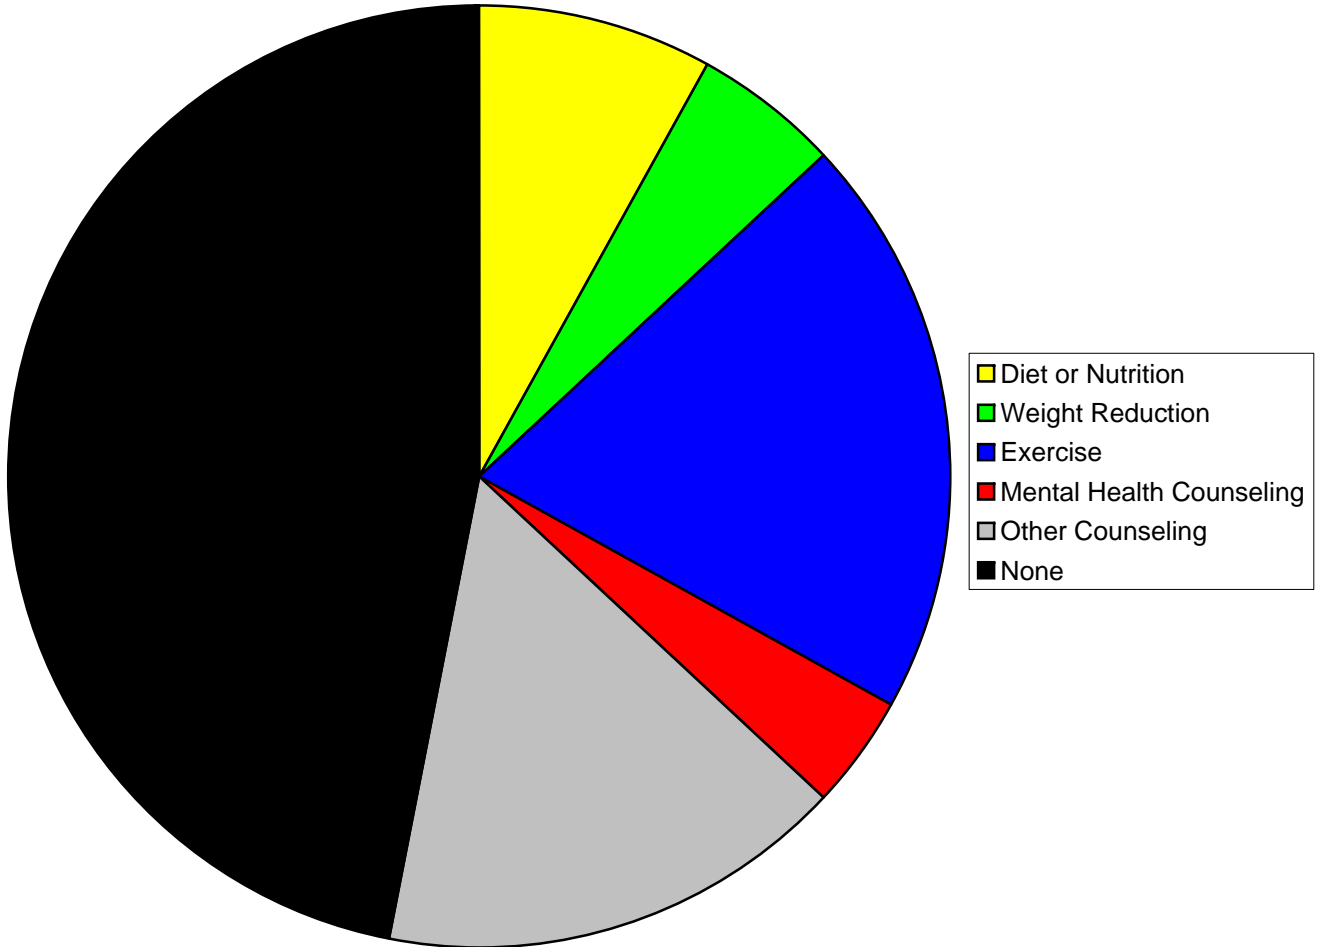

Supplement: MOESM3 [file 9644480]
